# Supplementary material
Source: publisher figshare collection journal article supplement (https://sage.figshare.com/ndownloader/files/14909339)
Supplement: Supplementary file 1 [file 14909339]

**Supplementary Table 1.** Baseline characteristics of patients with stage IV colorectal cancer according to chemotherapy regimen

| Variables                  |                             | 5-FU based<br>(n=51) | Oxaliplatin-based<br>(n=52) | <i>p</i> value |
|----------------------------|-----------------------------|----------------------|-----------------------------|----------------|
| Period of surgery          | 2003-2010                   | 37 (73%)             | 7 (13%)                     | <0.0001        |
|                            | 2011-2017                   | 14 (27%)             | 45 (87%)                    |                |
| Age, year                  | Mean ± SD                   | 62.6 ± 10.6          | 61.3 ± 11.0                 | 0.55           |
| Gender                     | Male                        | 29 (57%)             | 30 (58%)                    | 0.93           |
| ECOG PS                    | 0                           | 51 (100%)            | 50 (96%)                    | 0.10           |
|                            | 1                           | 0 ( 0%)              | 2 ( 4%)                     |                |
| Hemoglobin, g/dL           | Mean ± SD                   | 12.2 ± 1.9           | 12.0 ± 1.6                  | 0.68           |
| Albumin, g/dL              | Mean ± SD                   | 3.8 ± 0.4            | 3.7 ± 0.5                   | 0.57           |
| CEA                        | Elevated                    | 38 (75%)             | 41 (79%)                    | 0.60           |
| CA 19-9                    | Elevated                    | 20 (39%)             | 30 (58%)                    | 0.060          |
| Primary site               | Right-sided colon           | 16 (31%)             | 22 (42%)                    | 0.49           |
|                            | Left-sided colon            | 17 (33%)             | 19 (37%)                    |                |
|                            | Rectum                      | 18 (35%)             | 11 (21%)                    |                |
| Size of primary cancer, mm | Mean ± SD                   | 54.0 ± 21.9          | 50.3 ± 19.4                 | 0.36           |
| Obstruction                | Yes                         | 24 (46%)             | 52 (50%)                    | 0.61           |
| Histology                  | Differentiated <sup>a</sup> | 42 (82%)             | 49 (94%)                    | 0.072          |
|                            | Others                      | 9 (18%)              | 3 ( 6%)                     |                |

5-FU, 5-fluorouracil; SD, standard deviation; ECOG, Eastern Cooperative Oncology Group; PS, performance status; CEA, carcinoembryonic antigen; CA 19-9, carbohydrate antigen 19-9.

<sup>a</sup> differentiated adenocarcinoma.

**Supplementary Table 1 (continued).** Baseline characteristics of patients with stage IV colorectal cancer according to chemotherapy regimen

| Variables                                   |                     | 5-FU based | Oxaliplatin-based | <i>p</i> value |
|---------------------------------------------|---------------------|------------|-------------------|----------------|
|                                             |                     | (n=51)     | (n=52)            |                |
| Depth                                       | -pT3                | 20 (39%)   | 19 (37%)          | 0.78           |
|                                             | pT4                 | 31 (61%)   | 33 (63%)          |                |
| Regional lymph node metastasis              | Yes                 | 42 (82%)   | 44 (85%)          | 0.76           |
| Lymphatic invasion                          | Yes                 | 29 (57%)   | 33 (63%)          | 0.49           |
| Venous invasion                             | Yes                 | 44 (86%)   | 49 (94%)          | 0.17           |
| <i>KRAS</i> exon 2 status <sup>b</sup>      | Wild-type           | 10 (77%)   | 16 (46%)          | 0.10           |
|                                             | Mutant              | 3 (23%)    | 19 (54%)          |                |
| DNA microsatellite instability <sup>b</sup> | Stable              | 34 (100%)  | 45 (100%)         | 1.00           |
| Number of metastasized Organs               | 1                   | 45 (96%)   | 45 (87%)          | 1.00           |
|                                             | 2                   | 6 ( 4%)    | 7 (13%)           |                |
| Metastasized organs                         | Liver               | 37 (73%)   | 35 (67%)          | 0.56           |
|                                             | Lung                | 5 (10%)    | 3 ( 6%)           | 0.49           |
|                                             | Distant lymph nodes | 1 ( 2%)    | 3 ( 6%)           | 0.62           |
|                                             | Peritoneum          | 14 (27%)   | 14 (27%)          | 0.95           |
|                                             | Ovary               | 0 ( 0%)    | 2 ( 4%)           | 0.50           |
|                                             | Others              | 0 ( 0%)    | 2 ( 4%)           | 0.50           |
| Blood transfusions                          | Yes                 | 9 (18%)    | 6 (12%)           | 0.55           |
| Postoperative complications                 | Grade 2-            | 20 (39%)   | 16 (31%)          | 0.37           |

5-FU, 5-fluorouracil.

<sup>b</sup> excluding cases that were not evaluated.
